# Supplementary material for: Zwitterionic nanocapsule-based wound dressing with the function of gradient release of multi-drugs for efficient wound healing
Source: Royal Society of Chemistry journal article supplement (doi:10.1039/d3tb01073b), 2023-01-01
Supplement: d3tb01073b1.pdf [file d3tb01073b1.pdf]

## Support Information

### Supporting Information

*for*

### **Zwitterionic nanocapsules-based wound dressing with function of gradient release multi-drugs for efficient wound healing**

Jiahui Zhou,<sup>a,+</sup> Kaishun Xia,<sup>b,+,\*</sup> Yuting Li,<sup>a,+</sup> Shihua Mao,<sup>a</sup> Yucong Gu,<sup>a</sup> Mengjie Si,<sup>a</sup>  
Shuaibing Wang,<sup>a</sup> Guangyan Du,<sup>a,\*</sup> Yisheng Xu,<sup>c</sup> Dong Zhang,<sup>d</sup> Si Yu Zheng,<sup>a,\*</sup> Jintao  
Yang<sup>a,\*</sup>

<sup>a</sup> Zhejiang Key Laboratory of Plastic Modification and Processing Technology, College of Materials Science & Engineering, Zhejiang University of Technology, Hangzhou 310014, P. R. China.

E-mails: [duguangyan@zjut.edu.cn](mailto:duguangyan@zjut.edu.cn); [zhengsiyu@zjut.edu.cn](mailto:zhengsiyu@zjut.edu.cn); [yangjt@zjut.edu.cn](mailto:yangjt@zjut.edu.cn)

<sup>b</sup> Department of Orthopedics, The Second Affiliated Hospital, School of Medicine, Zhejiang University, Hangzhou, 310009, Zhejiang, P. R. China.

E-mails: [xks@zju.edu.cn](mailto:xks@zju.edu.cn)

<sup>c</sup> School of Chemical Engineering, East China University of Science and Technology, Shanghai 200237, PR China.

<sup>d</sup> The Wallace H. Coulter Department of Biomedical Engineering, Georgia Institute of Technology and Emory University, Atlanta, GA 30332, United States.

+ These authors contributed equally to this work.

## Support Information

**Table S1.** The recipe for adjusting UCST of zwitterionic nanocapsules.

| Run            | The mass ratio of DVBAPS/SBMA | Amphi-RAFT agent (wt%) | Core/shell ratio | APS and TEMED ( $\text{mmol}\cdot\text{L}^{-1}$ ) | Tween 80 and Span 80 (wt%) |
|----------------|-------------------------------|------------------------|------------------|---------------------------------------------------|----------------------------|
| 1              | 2/1                           | 6                      | 1/1              | 5.04                                              | 0.5                        |
| 2              | 3/1                           | 6                      | 1/1              | 5.04                                              | 0.5                        |
| 3              | 4/1                           | 6                      | 1/1              | 5.04                                              | 0.5                        |
| 4 <sup>a</sup> | 2/1                           | 6                      | 1/1              | 5.04                                              | 0.5                        |
| 5 <sup>a</sup> | 3/1                           | 6                      | 1/1              | 5.04                                              | 0.5                        |
| 6 <sup>a</sup> | 4/1                           | 6                      | 1/1              | 5.04                                              | 0.5                        |
| 7 <sup>b</sup> | 3/1                           | 6                      | 1/1              | 5.04                                              | 0.5                        |

<sup>a</sup> The ZNs loaded with Methyl Orange.

<sup>b</sup> The ZNs loaded with bFGF.

## Support Information

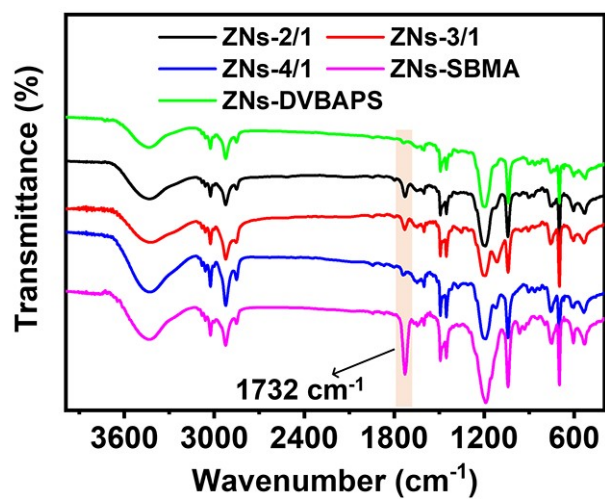

**Fig. S1** FTIR spectrum of ZNs with different DVBAPS/SBMA copolymerization ratios.

## Support Information

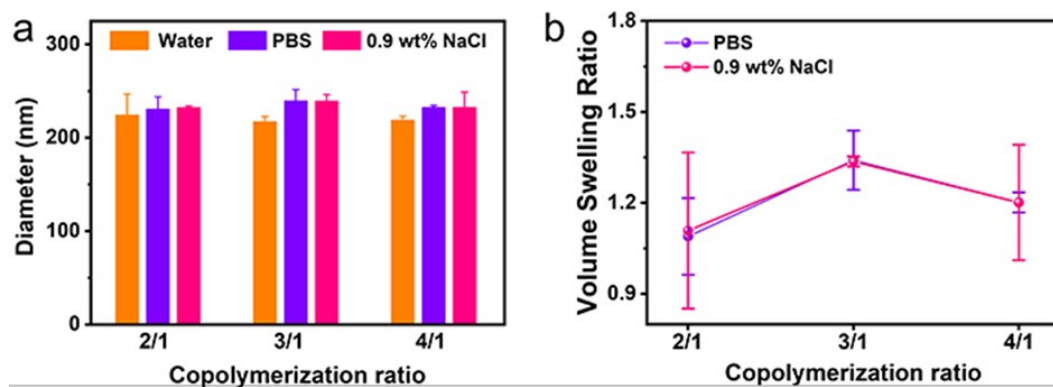

**Fig. S2** Salt-responsive behavior of the prepared ZNs. (a) Hydrodynamic diameters of the prepared ZNs with different mass ratios of DVBAPS/SBMA in water, PBS and 0.9 wt% NaCl. (b) Volume swelling ratios of ZNs with different mass ratios of DVBAPS/SBMA in PBS and 0.9 wt% NaCl.

## Support Information

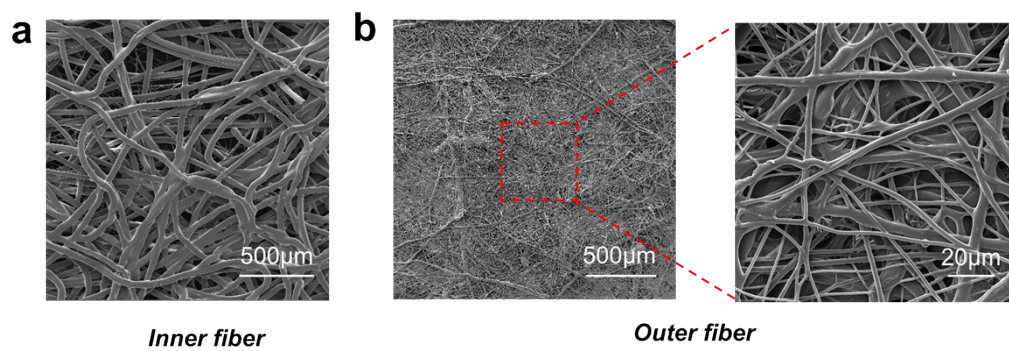

**Fig. S3** The SEM images of (a) inner fiber and (b) outer fiber of double-layer cotton fibers.

## Support Information

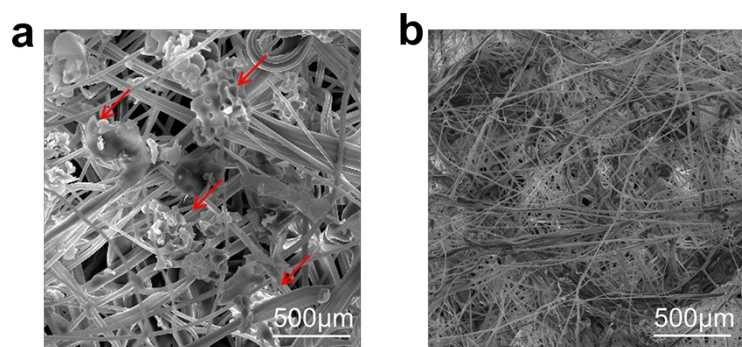

**Fig. S4** The SEM images of (a) inner surface and (b) outer surface of ZNs@ cotton fabric.

## Support Information

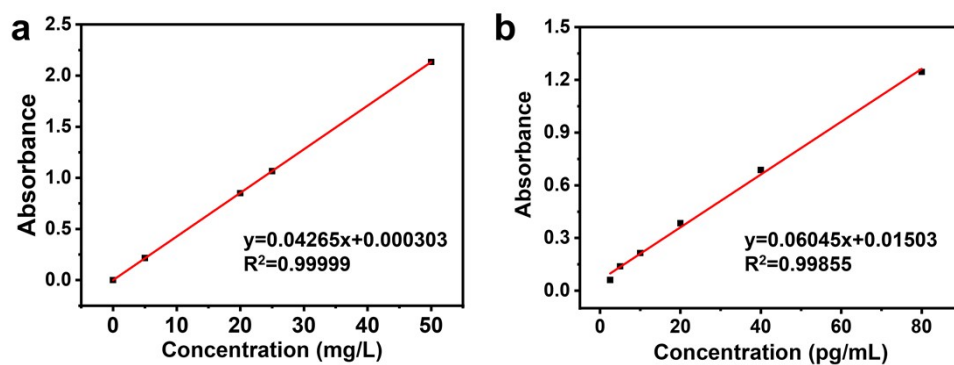

**Fig. S5** Standard curve of norfloxacin ( $\lambda=324$  nm) plotted by UV-vis; (b) standard curve of bFGF drawn by a microplate reader.
